# Supplementary material for: Neurofeedback for tinnitus: study protocol for a randomised controlled trial assessing the specificity of an alpha/delta neurofeedback training protocol in alleviating both sound perception and psychological distress in a cohort of chronic tinnitus sufferers
Source: PubMed Central journal article supplement (PMC7201543; doi:10.1186/s13063-020-04309-y), 2020-05-05
Supplement: 13063_2020_4309_MOESM2_ESM.pdf [file 13063_2020_4309_MOESM2_ESM.pdf]

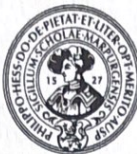

Fachbereich Psychologie  
Dr. Cornelia Weise

- im Hause -

Fachbereich Psychologie  
AE Entwicklungspsychologie

**Prof. Dr. Martin Pinquart**  
**Vorsitzender der Ethikkommission**

Tel.: 06421 – 2823626

Fax: 06421 – 2823685

E-mail: [pinquart@uni-marburg.de](mailto:pinquart@uni-marburg.de)

Anschrift: Gutenbergstraße 18  
35032 Marburg

Marburg, den 06.06.2018

**Stellungnahme zum Addendum zum Antrag „Neurofeedback bei Tinnitus“ an die Ethik-Kommission des Fachbereichs Psychologie (Aktenzeichen 2018-04k)**

Sehr geehrte Frau Weise,

gegen die im Addendum genannten Modifikationen Ihres Antrags bestehen keine grundlegenden ethischen Bedenken.

Zudem weist die Kommission explizit darauf hin, dass ihr Votum in einer Empfehlung besteht, die weder die Prüfung von Datenschutzrecht zum Gegenstand hat, noch den Zweck und das Ziel, die antragstellenden Wissenschaftlerinnen und Wissenschaftler von der Notwendigkeit der Einhaltung des geltenden Rechts zu entlasten. Zudem empfiehlt die Kommission eine Beratung durch den lokalen Datenschutzbeauftragten der Universität in Hinblick darauf, ob die Datenerhebung und Datenspeicherung, sowie die Teilnehmerinformationen und Einwilligungen der in Kraft getretenen EU-Datenschutz-Grundverordnung genügen.

Die Ethik-Kommission (EK) übernimmt keinerlei Haftung für Schäden, die aus einer wissenschaftlichen Untersuchung entstehen, zu der die EK auf Antrag Stellung genommen hat. Dieser Haftungsausschluss gilt auch für den Fall, dass sich der Antragsteller bei der Untersuchungsdurchführung an die Empfehlungen der EK hält, es sei denn, die EK hat vorsätzlich oder grob fahrlässig fehlerhafte oder rechtswidrige Empfehlungen abgegeben.

Eine erneute Vorlage des Antrags und der Unterlagen ist nicht erforderlich.

Mit freundlichen Grüßen

Handwritten signature of Martin Pinquart in blue ink.

Mit freundlichen Grüßen
